# Supplementary material
Source: Springer Nature journal article supplement (https://www.springermedizin.de/resource/supplementary/12961_2012_264_MOESM2_ESM.pdf/9570920)

# rNPV Total

Start  
Hit Generation  
Hit to Lead  
Lead Optimisation  
Preclinical  
Phase I  
Phase II  
Phase III  
Registration

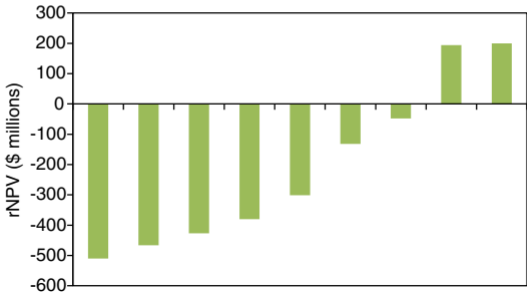

Supplement: MOESM2 [file 9570920]
